# Supplementary material for: Comparative Transcriptome Analysis between a Resistant and a Susceptible Wild Tomato Accession in Response to Phytophthora parasitica
Source: MDPI journal article supplement (doi:10.3390/ijms19123735), 2018-11-23
Supplement: s1 [file s1]

**Comparative transcriptome analysis between a resistant  
and a susceptible wild tomato accession in response to  
*Phytophthora parasitica***

Zunaira Afzal Naveed <sup>1,2</sup> and Gul Shad Ali<sup>1,2\*</sup>

<sup>1</sup>Mid-Florida Research and Education Center and <sup>2</sup>Department of Plant Pathology, University of Florida/Institute of Food and Agricultural Sciences, Apopka, FL, USA.

**Corresponding Author:**

Gul Shad Ali\*

gsali@ufl.edu

A

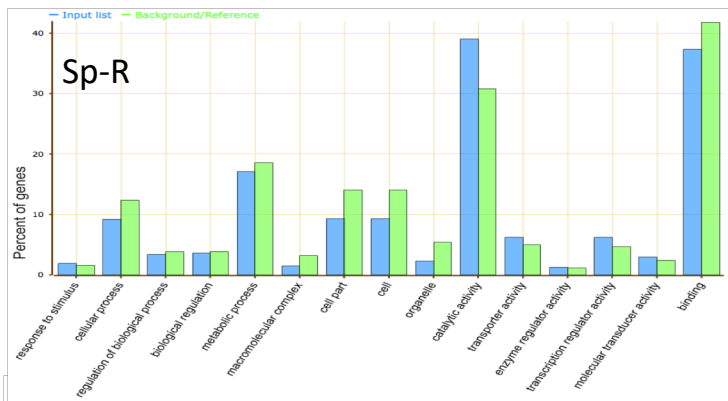

B

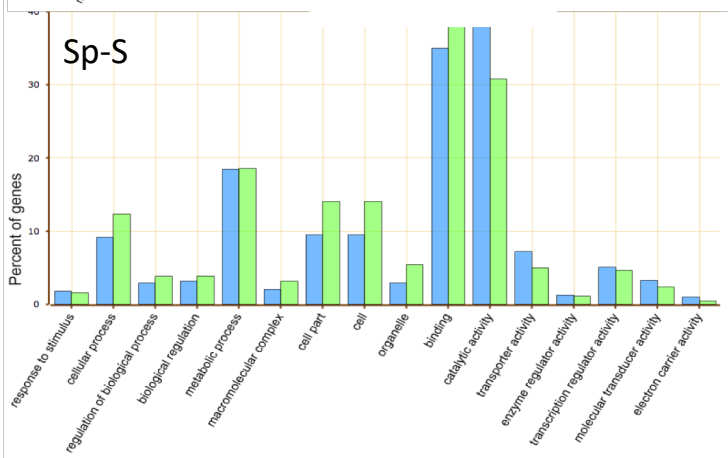

C

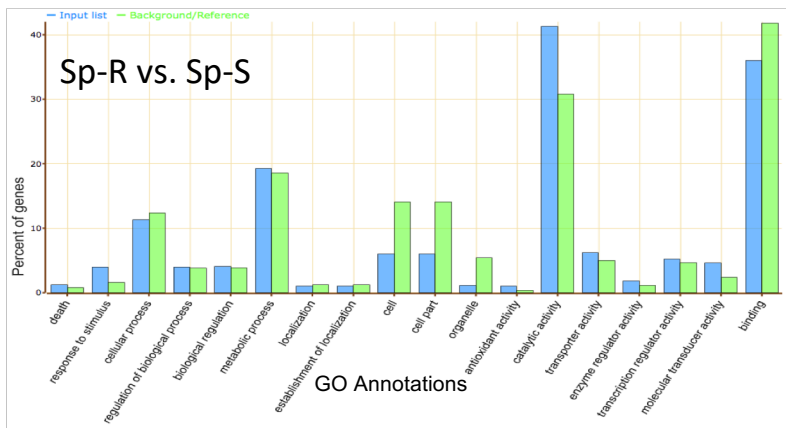

**Supplementary Figure 1.** Overview of GO annotations assignment of DEGs by SEA tool of AgriGO. Percent distribution of DEGs across enriched GO terms for cellular component, molecular function and biological processes for all DEGs found in *P. parasitica* treated vs. control samples of Sp-R genotype at both 24 and 48hpi (A) for Sp-S genotype (B) DEGs identified by Sp-R treated vs. Sp-S treated samples at both time points (C). Green bars represents reference background (*S. lycopersicum* ITAG 2.4) used to calculate enrichment and blue bar represent input DEGs.

# Sp-R

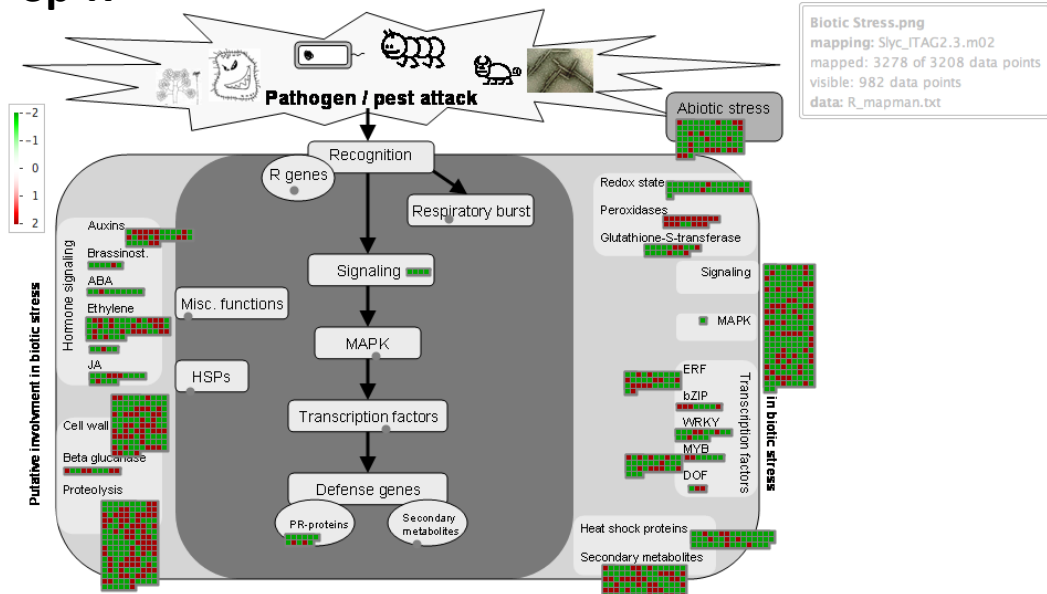

# Sp-S

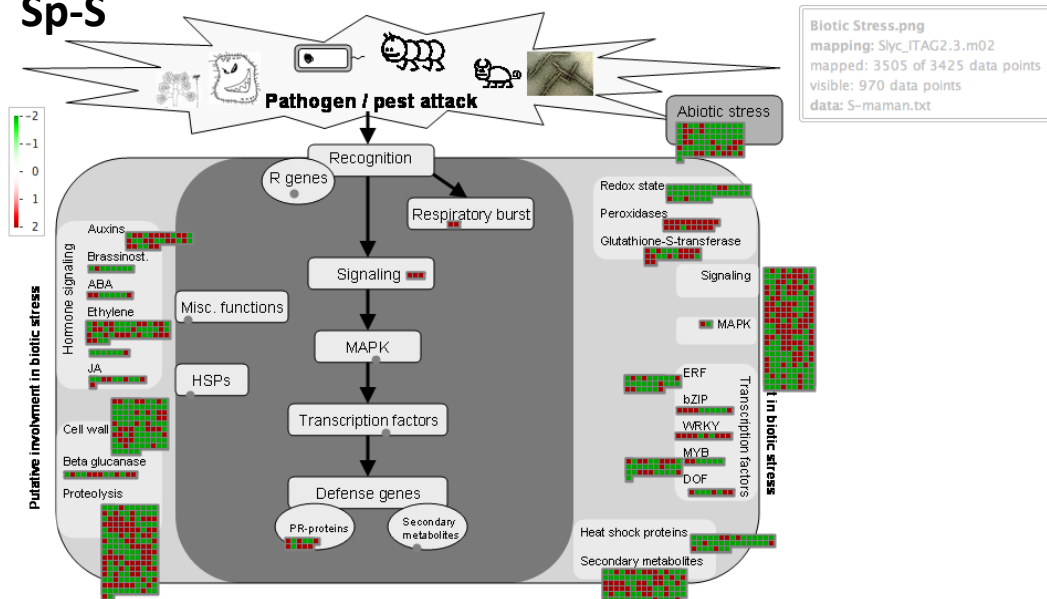

**Supplementary Figure 2:** Visualization of differentially expressed genes in wild tomatoes in response to *P. parasitica* on biotic stress pathway , (A) Resistant accession (B) Susceptible accession. Color gradient represents log2 fold ratios with red representing upregulation and blue representing downregulation in treatments over controls.

Sp-R

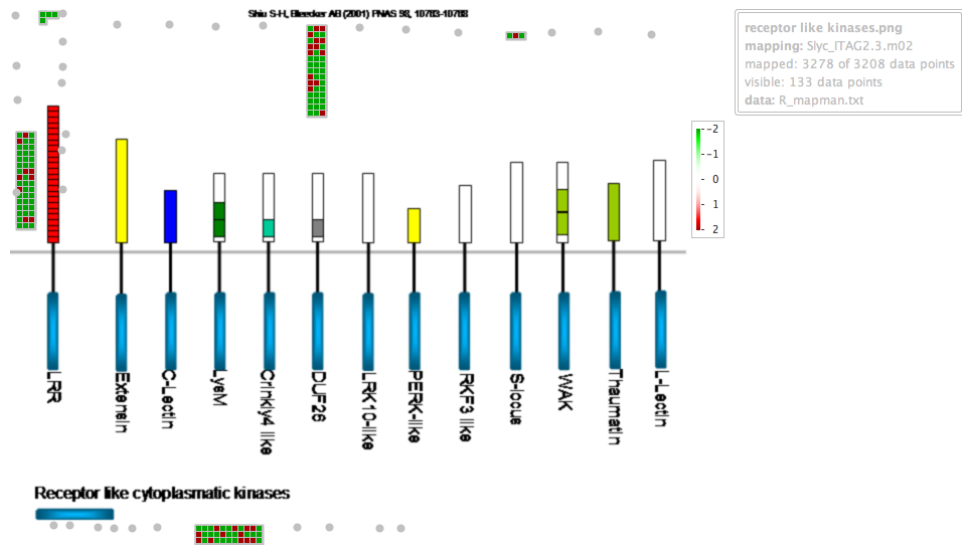

Sp-S

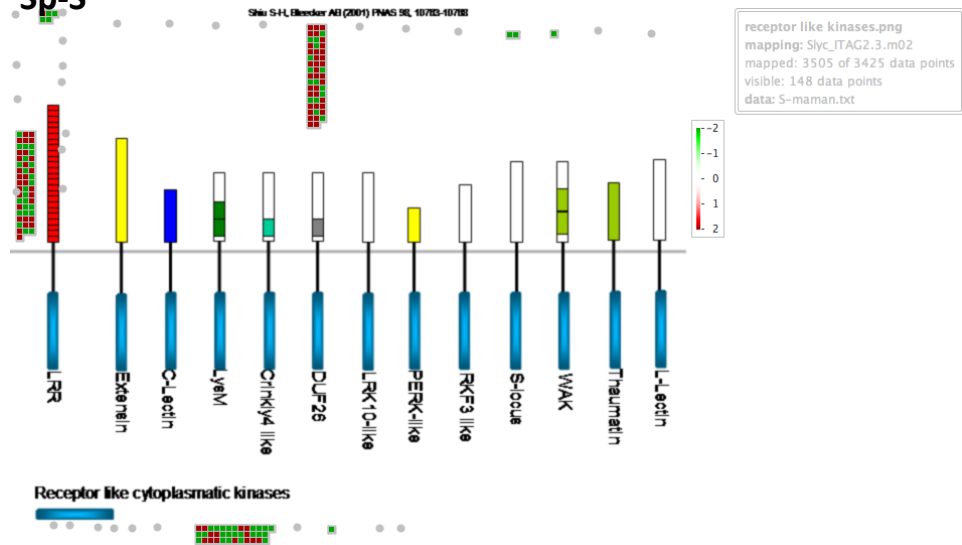

**Supplementary Figure 3** : Differentially expressed genes of wild tomatoes in response to *P. parasitica*, encoding DUF26 type receptor like kinases (A) Resistant accession (B) Susceptible accession. Color gradient represents log<sub>2</sub> fold ratios with red representing upregulation and blue representing downregulation in treatments over controls.

**Table S1. qRT-PCR primers for selected genes.**

| Transcript ID    | Description                               | Primers                |
|------------------|-------------------------------------------|------------------------|
| Solyc07g043420.2 | 2-oxoglutarate and Fe dependent oxygenase | GGAGGCAGGGTTCTTTGACA   |
|                  |                                           | ATGCATTGCCAATAGGCTGC   |
| Solyc08g029000.2 | lipoxygenase 1                            | AGCACACCCGATGAGTTTGA   |
|                  |                                           | TGAAGAACTTGAGGTGTTGGGA |
| Solyc09g010630.2 | heat shock protein 70                     | ATGGCTGGAAGGGTGAAGG    |
|                  |                                           | ACGCTCAGAGTCGGTGAATC   |
| Solyc11g069700.1 | Elongation factor Tu family               | TGTGCCGATTTCTGGTTTCG   |
|                  |                                           | ACGACCAACAGGAACAGTCC   |
| Solyc04g080960.2 | Papain family cysteine protease           | GACTGGCGTGAAAAAGGAGC   |
|                  |                                           | GGGTCACACTCATGGTCACA   |



**Table S2: Number of DEGs found among all comparisons.**

|                                    | Total DEGs | Up regulated DEGs | Down regulated DEGs | Specific DEGs |
|------------------------------------|------------|-------------------|---------------------|---------------|
| S-24hpi treated vs S-control       | 3079       | 1132              | 1947                | 775           |
| S-48hpi treated vs S-control       | 1919       | 811               | 1108                | 152           |
| R-24hpi treated vs R-control       | 2657       | 868               | 1789                | 519           |
| R-48hpi treated vs R-control       | 1836       | 606               | 1230                | 293           |
|                                    | 4598*      |                   |                     |               |
| R vs. S                            |            |                   |                     |               |
| R-control vs S-control             | 322        | 155               | 167                 | 178           |
| R-24hpi treated vs S-24hpi treated | 1158       | 287               | 871                 | 589           |
| R-48hpi treated vs S-48hpi treated | 889        | 207               | 682                 | 302           |
|                                    | 1681*      |                   |                     |               |
